# Supplementary material for: Data-driven identification of endophenotypes of Alzheimer’s disease progression: implications for clinical trials and therapeutic interventions
Source: Alzheimers Res Ther. 2018 Jan 15;10:4. doi: 10.1186/s13195-017-0332-0 (PMC6389228; doi:10.1186/s13195-017-0332-0)
Supplement: Supplementary file 2 — List of a priori specified patient-level variables at baseline that were used to define the identified classes distinguishing characteristics (XLSX 40 kb) [file 13195_2017_332_MOESM2_ESM.xlsx]

## Sheet: Sheet1
Demographics	Blood tests	Medications
Baseline ADAS-cog	Albumin	AD Rx
Gender	Alkaline phosphatase	Antidepressants
Age	ALT	Asthma Rx
Years of education	AST	Diabetes Rx
Race	Basophil count	Estrogens
Marital status	Basophil percent	Non-statin lipd-lowering
ApoE genotype	Calcium	NSAIDs
Trial/study	Creatine kinase	Omega-3
	Creatinine	Statins
	Direct bilirubin	Vitamin E
	Eosoniphil count
	Eosoniphil percent
	Hematocrit
	Hemoglobin
	LDH
	Lymphocyte percent
	MCH
	MCHC
	MCV
	Monocyte count
	Monocyte percent
	Neutrophil count
	Neutrophil percent
	Phosphorus
	Platlet count
	RBC
	Serum glucose
	Serum urice acid
	Total bilirubin
	Total cholesterol
	Total protein
	Triglycerides
	Urea nitrogen
	WBC
